# Supplementary material for: An Approach to Ring Resonator Biosensing Assisted by Dielectrophoresis: Design, Simulation and Fabrication
Source: MDPI journal article supplement (doi:10.3390/mi11110954), 2020-10-22
Supplement: s1 [file s1]

# An approach to ring resonator biosensing assisted by dielectrophoresis: Design, simulation and fabrication

Anders Henriksson, Laura Kasper, Matthias Jäger, Peter Neubauer and Mario Birkholz

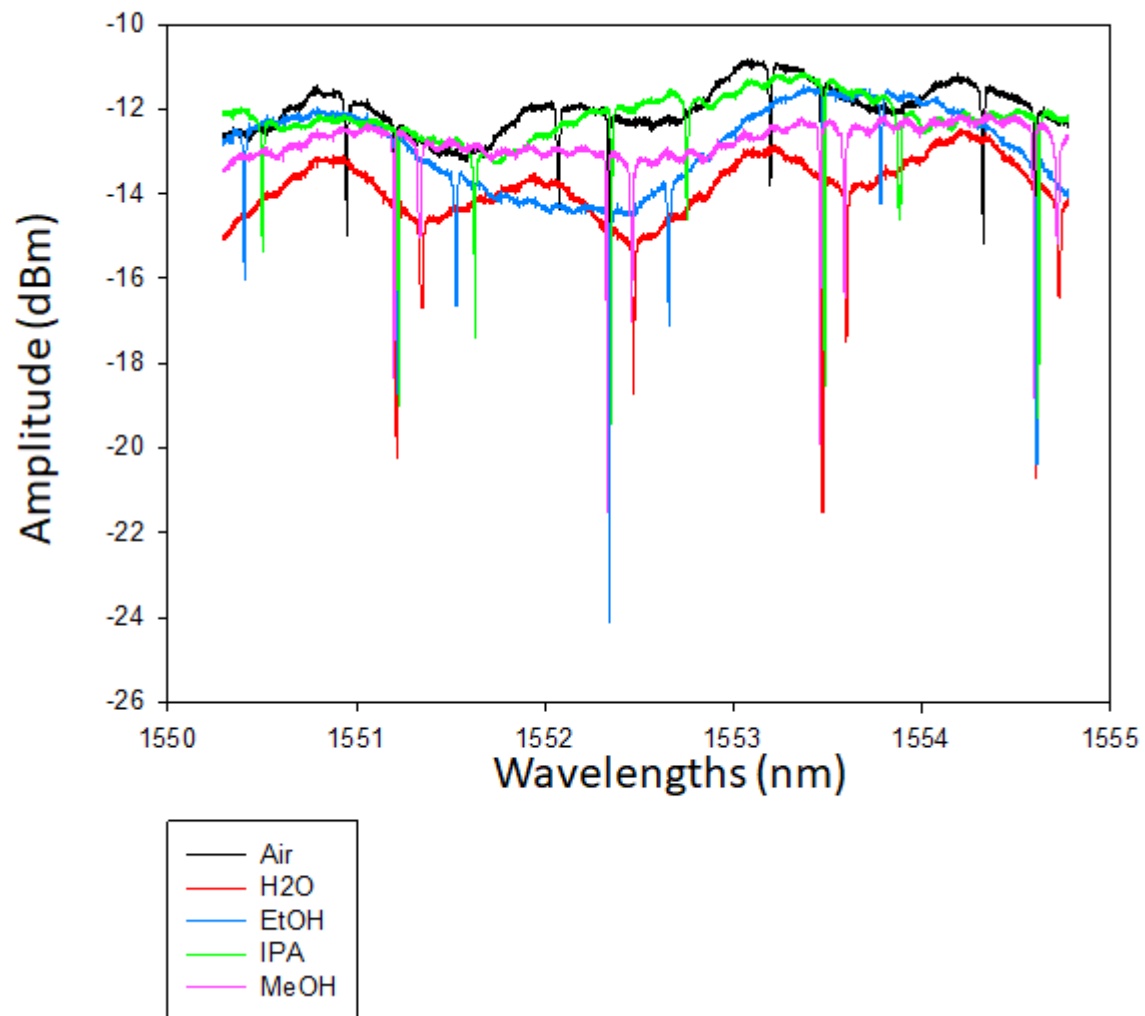

**Figure 1.** Typical transmission spectrum of ring resonators with coplanar electrode configuration.

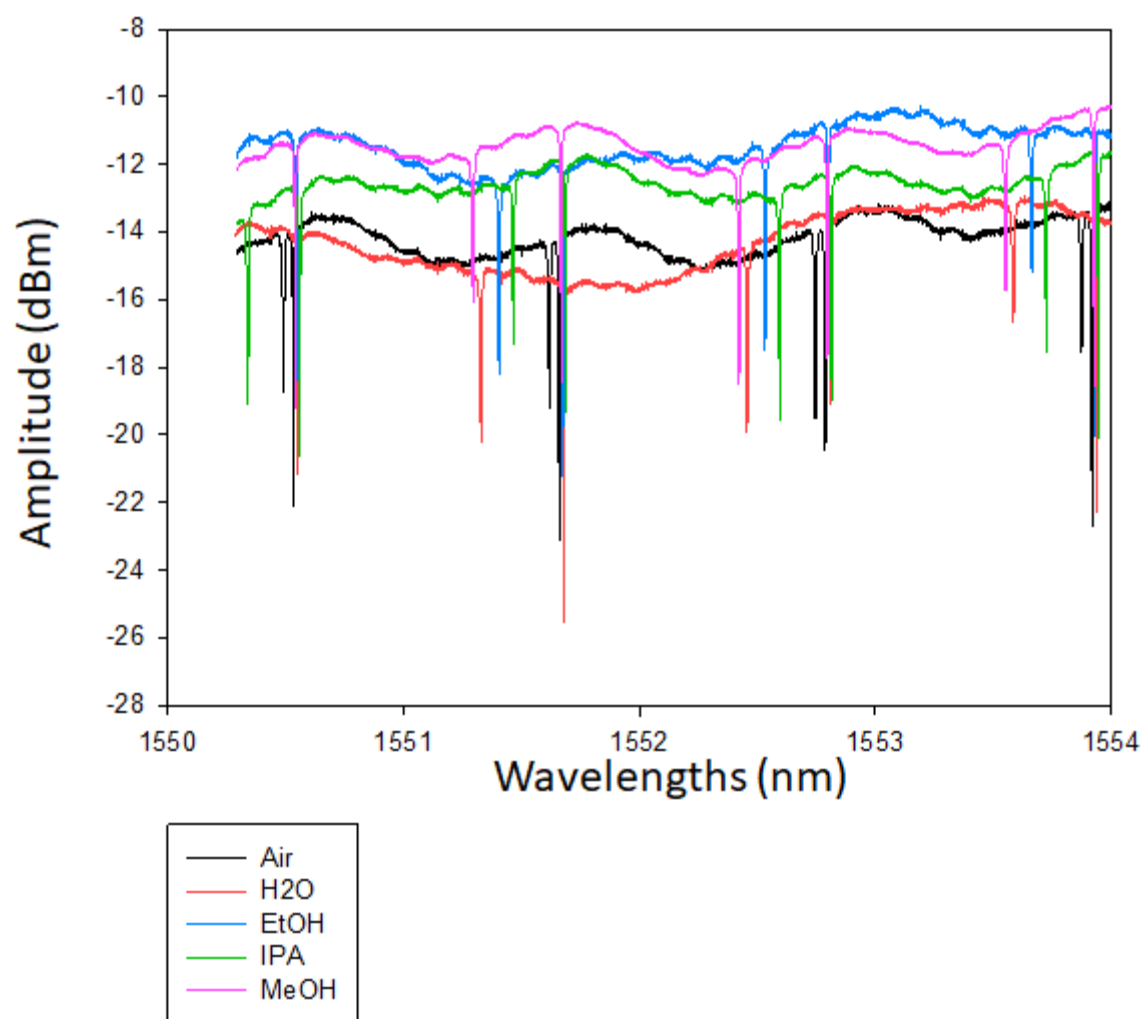

**Figure 2.** Typical transmission spectrum of ringresonator with top-bottom electrode configuration.

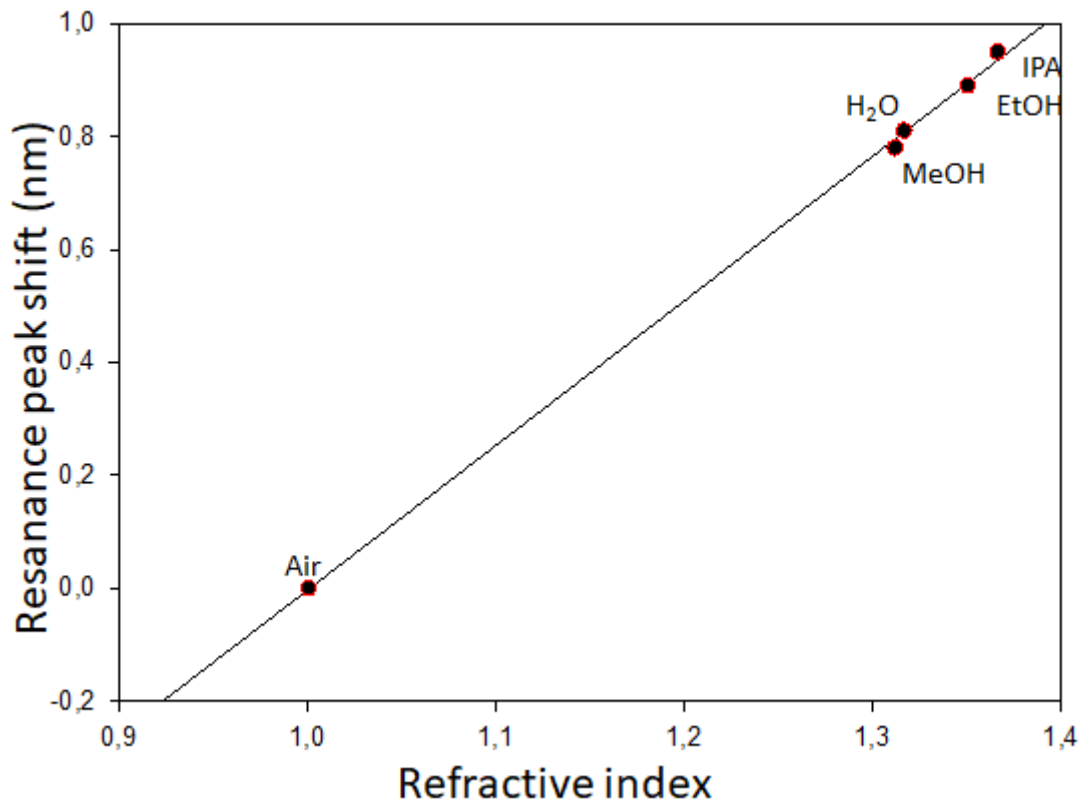

**Figure 3.** The resonance peak shift of the ring resonators with coplanar electrodes exposed to MeOH ( $n = 1.3118$ ), H<sub>2</sub>O ( $n = 1.3164$ ), EtOH ( $n = 1.3503$ ), and isopropanol ( $n = 1.3661$ ) normalized to the peak position in air.
